# Supplementary material for: Digitally enhanced recovery: Investigating the use of digital self-tracking for monitoring leisure time physical activity of cardiovascular disease (CVD) patients undergoing cardiac rehabilitation
Source: PLoS One. 2017 Oct 11;12(10):e0186261. doi: 10.1371/journal.pone.0186261 (PMC5636132; doi:10.1371/journal.pone.0186261)
Supplement: S1 Data — This file contains the data that is behind Figs 1–5. (XLSX) [file pone.0186261.s001.xlsx]

## Sheet: Valid
				Steps														Kcal burned														Total activity time (light + moderate + vigorous) (h)														Sedentary behaviour (h)
	Total valid weeks			Week														Week														Week														Week
			Study Ref.	1	2	3	4	5	6	7	8	9	10	11	12	13	Study Ref.	1	2	3	4	5	6	7	8	9	10	11	12	13	Study Ref.	1	2	3	4	5	6	7	8	9	10	11	12	13	Study Ref.	1	2	3	4
	12		02	48788	49603	51279	45717	54064	53612	55740	48564	50133	42414	41138	31486	N/A	02	14518	14836	14797	14567	14760	14587	14975	14633	14560	14436	14480	13908	N/A	02	31	35	37	29	32	31	38	36	33	31	34	27	N/A	02	78	79	72	95
	12		03	19686	29711	59826	89068	83349	63018	47839	62658	102787		103477	95701	100189	03	12026	12497	13553	14992	14617	13665	12881	13334	15058		14430	14335	14763	03	18	23	28	32	30	26	23	25	38		33	32	37	03	70	71	69	70
	12		04	30268	46986	46770	49438	51335	45940	52640	51255	47485	46436	42916	43406	N/A	04	13969	15686	15622	15718	16086	15570	15775	15493	15549	15863	15725	15008	N/A	04	21	28	27	26	29	26	26	26	26	30	28	27	N/A	04	51	67	69	68
	12		05	76038	78242	65358	68236	72744		62750	62054	85834	81161	76029	69479	68669	05	18677	18679	18057	18504	19100		18289	18254	19148	19334	18954	18363	18345	05	58	56	51	57	65		55	53	53	59	59	52	55	05	49	49	54	49
	11		06	45052	61215	53218		53639	43646	71549	90208		83332	79983	67812	84834	06	17068	18258	18139		17808	16962	18326	19282		19123	18723	17812	19356	06	33	38	42		36	33	44	51		46	45	37	47	06	65	64	64
	12		07	81198	70112	85670	79183	75372	79429	89151	80888	86776	78506	72411	69269	20924	07	18205	17817	18711	18442	18274	18409	18914	18689	19180	18901	18121	18088	5963	07	45	33	39	40	40	43	48	48	49	50	45	43	15	07	43	65	56	60
	10		09	64598	51032	50691	56697	59770	51421	48877	47163	42163		60054		N/A	09	22009	22380	22813	23743	23960	25564	23854	26430	22262		29916		N/A	09	43	37	41	43	45	47	40	37	36		47		N/A	09	62	74	76	64
	6		11	61204	68237	62376	82477	82591			74078					22225	11	15305	15590	15425	16339	16161			15741					11171	11	37	40	38	40	44			45					11	11	65	68	73	70
	11		12	94103	106526	87669	106649		103217	118810	115958	129036	112718	132561		N/A	12	17956	18648	17474	18515		18031	19056	18702	19638	19127	19842		N/A	12	73	79	69	76		73	80	80	88	84	91		N/A	12	41	40	38	43
	9		13	44748	60328	61710	51997	37124	51945	41803		49716		51141		N/A	13	21051	22888	22968	21896	20580	21820	20979		22149		22506		N/A	13	40	38	40	34	31	40	37		46		49		N/A	13	65	68	66	65
	10		14	53055		81793	81968	79285	86840	73620	66543	65454	73177	71092		N/A	14	19535		21861	21832	21685	22233	21205	21352	21249	21360	20942		N/A	14	40		48	46	47	51	46	53	49	49	46		N/A	14	77		73	76
	12		15	88278	90145	128325	108635	122907	81510	109657	123958	184433	100743	110676	212286	51849	15	16459	16946	18023	17613	19139	15509	18137	16803	18400	16496	16801	19147	5005	15	37	38	46	41	45	37	44	40	46	42	45	52	14	15	66	73	60	67
	12		17	132712	96916	129657	123841	138326	143401	144153	111935	132070	107171	95699	91638	68048	17	18121	16962	18525	18399	19530	19220	18679	18442	19155	18488	18851	18944	11006	17	48	44	49	41	46	49	46	47	47	41	45	48	25	17	58	61	51	62
					Valid week (7 valid days)					Non-valid week (at least one non-valid day)
	141
				Week														Week														Week														Week
				1	2	3	4	5	6	7	8	9	10	11	12	13		1	2	3	4	5	6	7	8	9	10	11	12			1	2	3	4	5	6	7	8	9	10	11	12			1	2	3	4
	10.8462		Mean	64594.5	67421.1	74180.2	78658.8	75875.5	73089	76382.4	77938.5	88717	80628.7	78098.1	85134.6	59534	Mean	17299.9	17598.9	18151.4	18380	18475	18324.5	18422.5	18096.2	18758.9	18125.3	19107.6	16950.6	12229.9	Mean	40.3077	40.75	42.6923	42.0833	40.8333	41.4545	43.9167	45.0833	46.4545	48	47.25	39.75	29.1429	Mean	60.7692	64.9167	63.1538	65.75
	1.70276		SD	28881.3	21515.6	26641.4	24321.5	28237.3	28846	31140.6	25869.6	42953.5	23180.3	26967.2	52127	27750.4	SD	2723.84	2825.07	2853.57	2752.81	2692.54	3488.31	2801.77	3303.91	2575.82	2001.11	4016.04	2021.78	5191.82	SD	13.8752	13.8872	10.306	12.9	9.78803	12.9921	13.8652	13.9431	15.2635	15.3623	15.3467	9.82026	16.146	SD	11.3555	10.396	10.5236	12.4239
	12		Maximum	132712	106526	129657	123841	138326	143401	144153	123958	184433	112718	132561	212286	100189	Maximum	22009	22888	22968	23743	23960	25564	23854	26430	22262	21360	29916	19147	19356	Maximum	73	79	69	76	65	73	80	80	88	84	91	52	55	Maximum	78	79	76	95
	6		Minimum	19686	29711	46770	45717	37124	43646	41803	47163	42163	42414	41138	31486	20924	Minimum	12026	12497	13553	14567	14617	13665	12881	13334	14560	14436	14430	13908	5005	Minimum	18	23	27	26	29	26	23	25	26	30	28	27	11	Minimum	41	40	38	43
[truncated: 65 more columns]

## Sheet: Compl.
				Steps														Kcal burned														Total activity time (light + moderate + vigorous) (h)														Sedentary behaviour (h)
	Total valid weeks			Week														Week														Week														Week
			Study Ref.	1	2	3	4	5	6	7	8	9	10	11	12	13	Study Ref.	1	2	3	4	5	6	7	8	9	10	11	12	13	Study Ref.	1	2	3	4	5	6	7	8	9	10	11	12	13	Study Ref.	1	2	3	4
	12		02	48788	49603	51279	45717	54064	53612	55740	48564	50133	42414	41138	31486	N/A	02	14518	14836	14797	14567	14760	14587	14975	14633	14560	14436	14480	13908	N/A	02	31	35	37	29	32	31	38	36	33	31	34	27	N/A	02	78	79	72	95
	12		03	19686	29711	59826	89068	83349	63018	47839	62658	102787	74449	103477	95701	100189	03	12026	12497	13553	14992	14617	13665	12881	13334	15058	12296	14430	14335	14763	03	18	23	28	32	30	26	23	25	38	32	33	32	37	03	70	71	69	70
	12		04	30268	46986	46770	49438	51335	45940	52640	51255	47485	46436	42916	43406	N/A	04	13969	15686	15622	15718	16086	15570	15775	15493	15549	15863	15725	15008	N/A	04	21	28	27	26	29	26	26	26	26	30	28	27	N/A	04	51	67	69	68
	12		05	76038	78242	65358	68236	72744	26638	62750	62054	85834	81161	76029	69479	68669	05	18677	18679	18057	18504	19100	10789	18289	18254	19148	19334	18954	18363	18345	05	58	56	51	57	65	24	55	53	53	59	59	52	55	05	49	49	54	49
	11		06	45052	61215	53218	51369	53639	43646	71549	90208	64199	83332	79983	67812	84834	06	17068	18258	18139	16967	17808	16962	18326	19282	18172	19123	18723	17812	19356	06	33	38	42	33	36	33	44	51	42	46	45	37	47	06	65	64	64	57
	12		07	81198	70112	85670	79183	75372	79429	89151	80888	86776	78506	72411	69269	20924	07	18205	17817	18711	18442	18274	18409	18914	18689	19180	18901	18121	18088	5963	07	45	33	39	40	40	43	48	48	49	50	45	43	15	07	43	65	56	60
	10		09	64598	51032	50691	56697	59770	51421	48877	47163	42163	56749	60054	43307	N/A	09	22009	22380	22813	23743	23960	25564	23854	26430	22262	20880	29916	21854	N/A	09	43	37	41	43	45	47	40	37	36	40	47	33	N/A	09	62	74	76	64
	6		11	61204	68237	62376	82477	82591	59324	27013	74078	70287	11258	32730	74013	22225	11	15305	15590	15425	16339	16161	14836	12391	15741	14164	10423	12048	13886	11171	11	37	40	38	40	44	36	20	45	34	7	14	27	11	11	65	68	73	70
	11		12	94103	106526	87669	106649	90336	103217	118810	115958	129036	112718	132561	22502	N/A	12	17956	18648	17474	18515	17202	18031	19056	18702	19638	19127	19842	3696	N/A	12	73	79	69	76	66	73	80	80	88	84	91	15	N/A	12	41	40	38	43
	9		13	44748	60328	61710	51997	37124	51945	41803	39489	49716	56512	51141	53104	N/A	13	21051	22888	22968	21896	20580	21820	20979	20872	22149	22292	22506	20669	N/A	13	40	38	40	34	31	40	37	39	46	49	49	44	N/A	13	65	68	66	65
	10		14	53055	57985	81793	81968	79285	86840	73620	66543	65454	73177	71092	61672	N/A	14	19535	17792	21861	21832	21685	22233	21205	21352	21249	21360	20942	18428	N/A	14	40	35	48	46	47	51	46	53	49	49	46	44	N/A	14	77	70	73	76
	12		15	88278	90145	128325	108635	122907	81510	109657	123958	184433	100743	110676	212286	51849	15	16459	16946	18023	17613	19139	15509	18137	16803	18400	16496	16801	19147	5005	15	37	38	46	41	45	37	44	40	46	42	45	52	14	15	66	73	60	67
	12		17	132712	96916	129657	123841	138326	143401	144153	111935	132070	107171	95699	91638	68048	17	18121	16962	18525	18399	19530	19220	18679	18442	19155	18488	18851	18944	11006	17	48	44	49	41	46	49	46	47	47	41	45	48	25	17	58	61	51	62
	141
					Valid week (7 valid days)					Non-valid week (at least one non-valid day)									Valid week (7 valid days)					Non-valid week (at least one non-valid day)									Valid week (7 valid days)					Non-valid week (at least one non-valid day)									Valid week (7 valid days)
	10.8462		Mean	64594.5	66695.2	74180.2	76559.6	76987.8	68457	72584.8	74980.8	85413.3	71125.1	74608.2	71975	59534	Mean	17299.9	17613.8	18151.4	18271.3	18377.1	17476.5	17958.5	18309.8	18360.3	17616.8	18564.5	16472.2	12229.9	Mean	40.3077	40.3077	42.6923	41.3846	42.7692	39.6923	42.0769	44.6154	45.1538	43.0769	44.6923	37	29.1429	Mean	60.7692	65.3077	63.1538	65.0769
	1.70276		SD	28881.3	20823.9	26641.4	24472.7	27401.8	29379.8	32683.4	26883.6	40281.6	27265.3	28590.9	45454.1	27750.4	SD	2723.84	2714.73	2853.57	2671.49	2609.06	3857.63	3135.16	3259.33	2665.67	3407.4	4292.63	4427.66	5191.82	SD	13.8752	13.4301	10.306	12.628	11.5503	12.8625	14.7672	13.4938	14.4534	17.1216	17.2019	10.8486	16.146	SD	11.3555	10.0796	10.5236	12.1621
	12		max	132712	106526	129657	123841	138326	143401	144153	123958	184433	112718	132561	212286	100189	max	22009	22888	22968	23743	23960	25564	23854	26430	22262	22292	29916	21854	19356	max	73	79	69	76	66	73	80	80	88	84	91	52	55	max	78	79	76	95
	6		min	19686	29711	46770	45717	37124	26638	27013	39489	42163	11258	32730	22502	20924	min	12026	12497	13553	14567	14617	10789	12391	13334	14164	10423	12048	3696	5005	min	18	23	27	26	29	24	20	25	26	7	14	15	11	min	41	40	38	43
[truncated: 65 more columns]
